# Supplementary material for: Determination of loss of chromosome Y in peripheral blood cells in males with idiopathic pulmonary fibrosis
Source: PubMed Central journal article supplement — Eur Respir J. 2024 Nov 14;64(5):2401303. doi: 10.1183/13993003.01303-2024 (PMC11561402; doi:10.1183/13993003.01303-2024), 2024-11-14

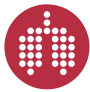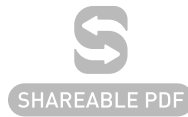

# Determination of loss of chromosome Y in peripheral blood cells in males with idiopathic pulmonary fibrosis

Magali Espinosa<sup>1</sup>, Iliana Herrera<sup>2</sup>, Ivette Buendía-Roldán <sup>2</sup>, Jorge Meléndez-Zajgla<sup>1</sup>, Annie Pardo<sup>3</sup> and Moisés Selman <sup>2</sup>

<sup>1</sup>Laboratorio de Genómica Funcional del Cáncer, Instituto Nacional de Medicina Genómica, Mexico City, Mexico. <sup>2</sup>Instituto Nacional de Enfermedades Respiratorias “Ismael Cosío Villegas”, Mexico City, Mexico. <sup>3</sup>Facultad de Ciencias, Universidad Nacional Autónoma de México, Mexico City, Mexico.

Corresponding author: Moisés Selman (mselman@yahoo.com.mx)

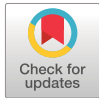

Shareable abstract (@ERSpublications)

**Idiopathic pulmonary fibrosis prevalence is higher in males. Loss of chromosome Y (LOY) occurs in elderly men, and is associated with ageing-related diseases. This study did not find association between IPF and LOY, likely due to the ethnic background.** <https://bit.ly/3ZIQHKi>

**Cite this article as:** Espinosa M, Herrera I, Buendía-Roldán I, *et al.* Determination of loss of chromosome Y in peripheral blood cells in males with idiopathic pulmonary fibrosis. *Eur Respir J* 2024; 64: 2401303 [DOI: 10.1183/13993003.01303-2024].

This extracted version can be shared freely online.

Copyright ©The authors 2024.

This version is distributed under the terms of the Creative Commons Attribution Non-Commercial Licence 4.0. For commercial reproduction rights and permissions contact [permissions@ersnet.org](mailto:permissions@ersnet.org)

Received: 5 July 2024  
Accepted: 21 Sept 2024

*To the Editor:*

Idiopathic pulmonary fibrosis (IPF) is a devastating and usually progressive disease associated with ageing [1]. The incidence and prevalence of IPF have been reported to be higher in males than in females, although the reasons are unclear [2–4].

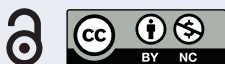

Supplement: ERJ-01303-2024.Shareable.pdf [file ERJ-01303-2024.Shareable.pdf]
